# Supplementary material
Source: PubMed Central journal article supplement (PMC7507062)
Supplement: EMBR-21-e49828-s001.pdf [file EMBR-21-e49828-s001.pdf]

## Expanded View Figures

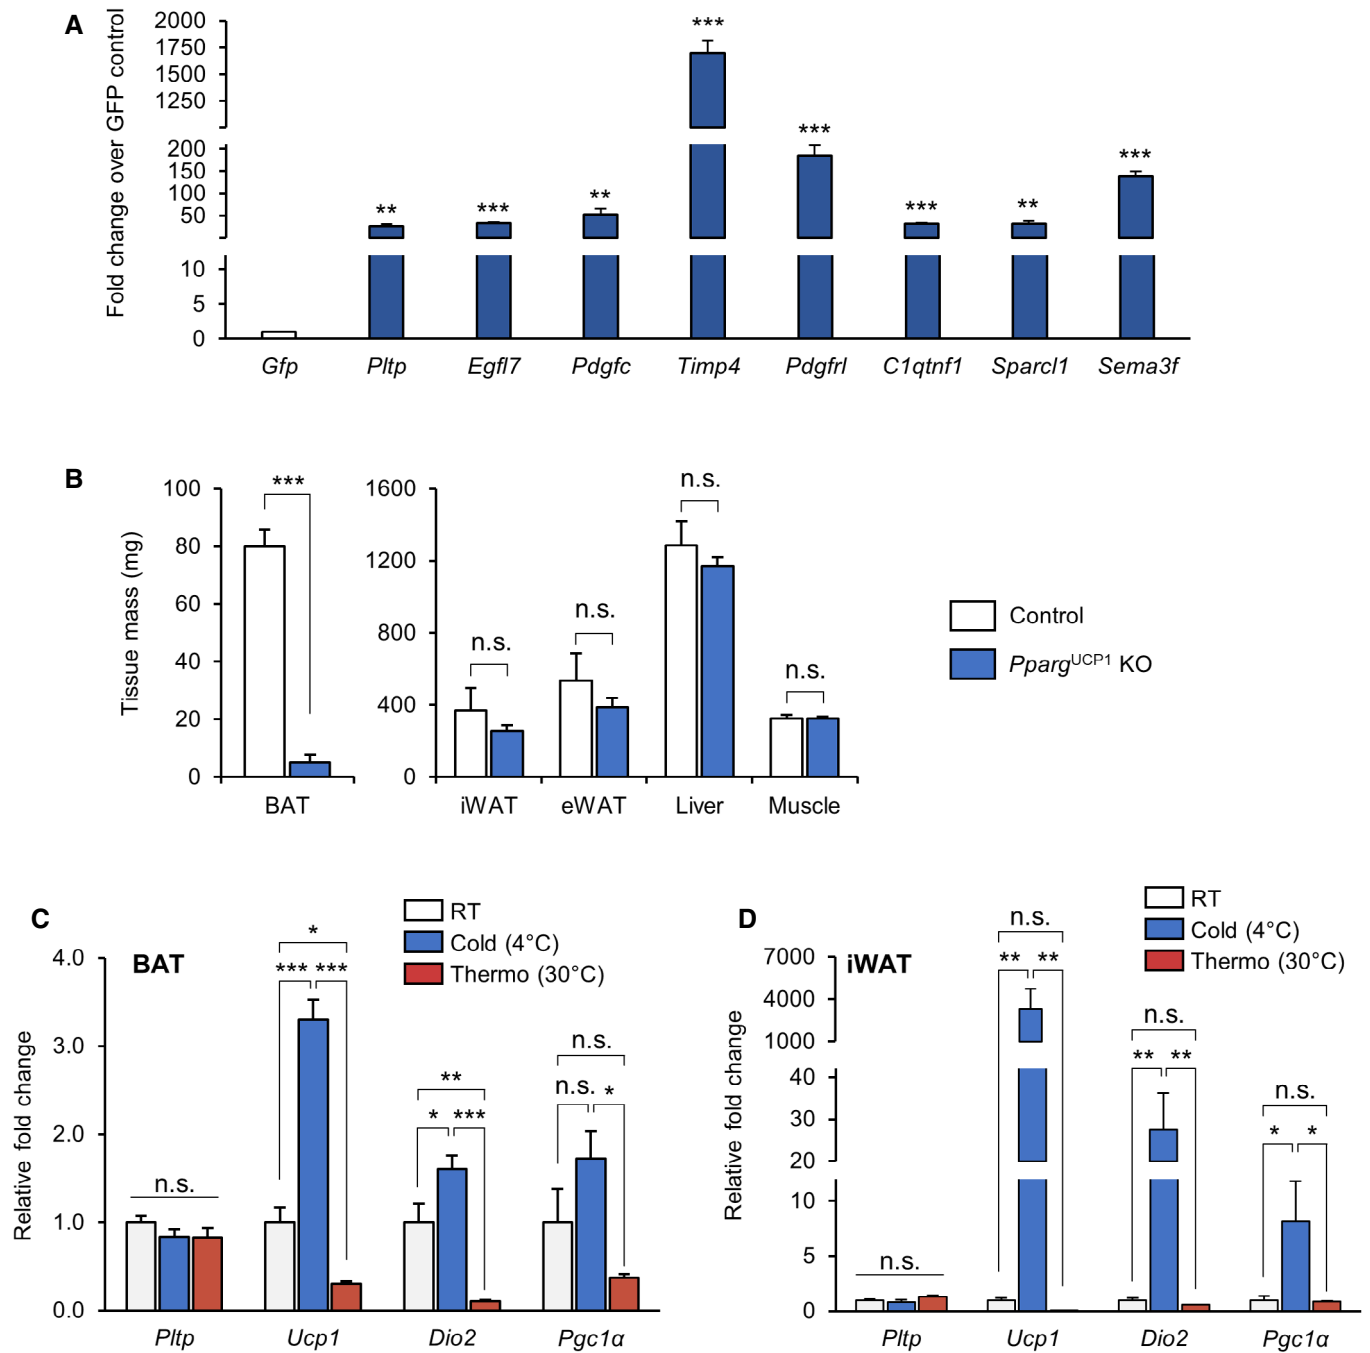

Figure EV1.

**Figure EV1. Expression of batokine candidates and regulation of PLTP expression.**

- A Hepatic expression of batokine candidates in mice that received adenovirus expressing indicated genes.  $n = 5$  for all groups.  $**P < 0.01$ ,  $***P < 0.001$  relative to GFP by Student's  $t$ -test.
- B Tissue mass of  $Pparg^{UCP1}$  KO mice and control mice.  $n = 3$  for control,  $n = 4$  for  $Pparg^{UCP1}$  KO.  $***P < 0.001$  relative to control by Student's  $t$ -test. N.S., not significant.
- C Relative gene expression of thermogenic genes in the interscapular BAT from C57Bl/6 mice housed at room temperature (RT), cold (4°C), or thermoneutrality (30°C) for 2 weeks.  $18s$  was used as an internal control.  $n = 5$  for all groups. ANOVA followed by Tukey's test.  $*P < 0.05$ ,  $**P < 0.01$ ,  $***P < 0.001$ . N.S., not significant.
- D Relative gene expression of thermogenic genes in the iWAT from C57Bl/6 mice housed at room temperature (RT) exposure to cold (4°C) and thermoneutrality (30°C) for 2 weeks.  $18s$  was used as an internal control.  $n = 5$  for all groups. ANOVA followed by Tukey's test.  $*P < 0.05$ ,  $**P < 0.01$ . N.S., not significant.

Data information: All the data were represented as mean  $\pm$  SEM.

Source data are available online for this figure.

**A** Mouse recombinant PLTP sequence:

1 ELPGCKIRVT SAALELVKQE GLR **FLEQELETITIPDVYGA**KGHFYFNISD VRVTQLHLIS SELHFQPDQDLLNINSNASL  
 81 GLHFRRQLLYWFLYDGGYINASAEGVSI RT GLQLSQDSSGRIKVS NVSCEASVSKMMAF GGTFRRMYNF FSTFITSGMR  
 161 FLLNQQICPVLYHAGTVLLN SLLDTPVRS SVDDL VGIDY SLLKDPVVSNGNLDMEFRGA FFPLKEDNWSLPNRAVEPQL  
 241 EDDERMVYVAFSEFFFD SAMESYFQAGALQLTLVGDVKVPS DLDMLLRATYFGSIVLLSPTVINSPLKLEATSPPRCTI  
 321 KPSGTTISITASVTITLAPPMLPEVELSKMIMEGRLSAKL TLRGKALRVKLDLRRFQIYS NQSALESAL IPLQAPLKT  
 401 LQIGVMPLLNERTWRGVQIPLPEGINFVRE VVTNHAGFVT VGADLHFAKGLREVIDKNRPADVAASHVPPPSAAAA

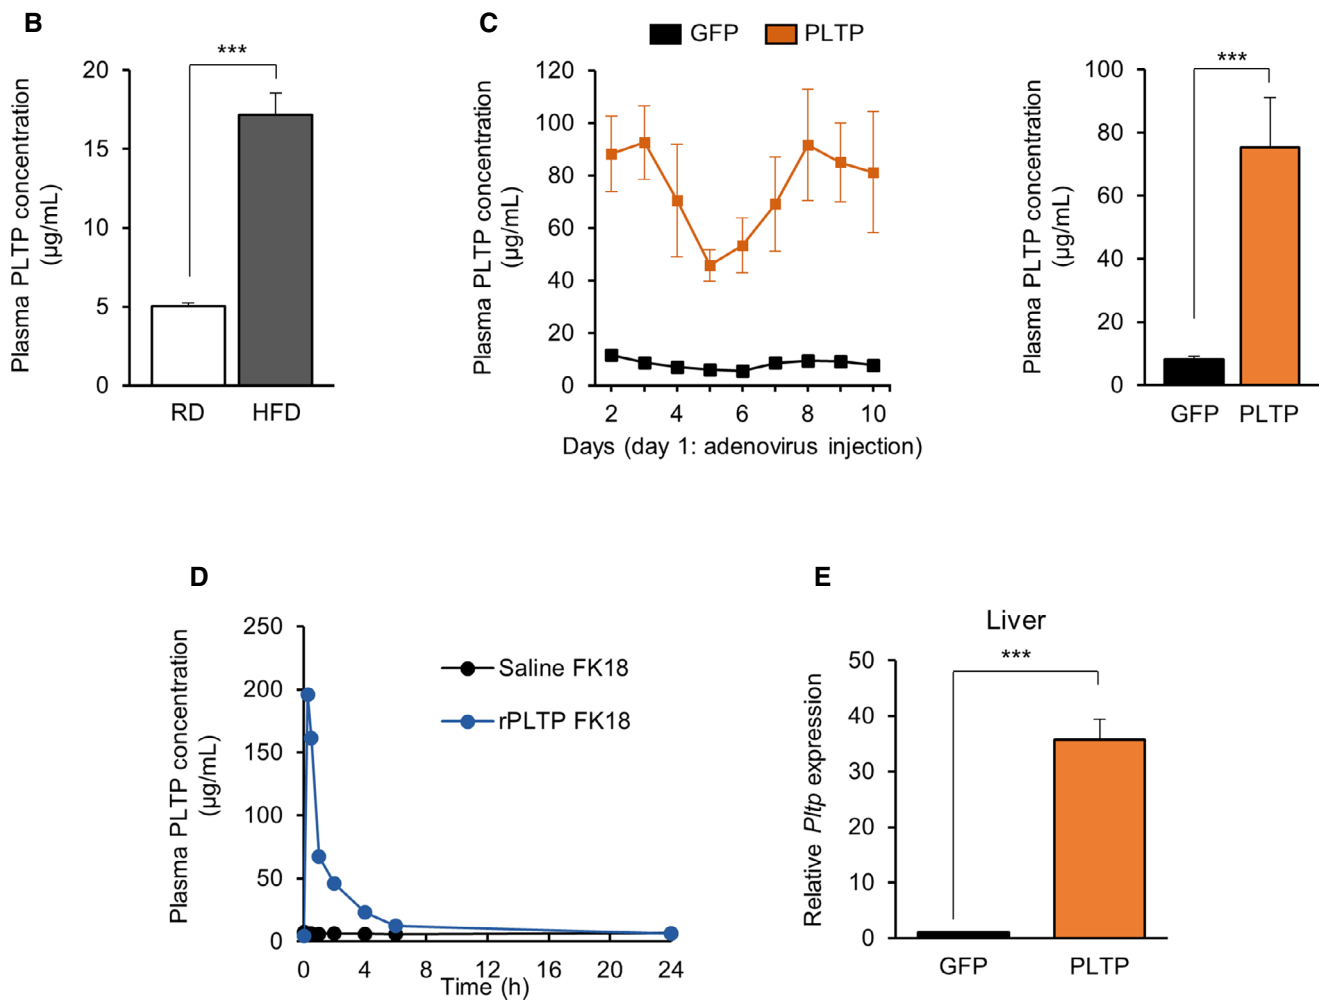**Figure EV2. Plasma PLTP levels following virally induced or recombinant PLTP administration.**

- A Mouse PLTP coding sequence (<https://www.ncbi.nlm.nih.gov/gene> (gene ID:18830). Amino acid sequence of peptide FK18 (for mass spectrometry quantification) is highlighted.
- B Plasma PLTP concentration of mice on regular chow diet (RD) and high-fat diet (HFD).  $n = 4$  for both groups.  $***P < 0.001$  by Student's  $t$ -test.
- C Plasma PLTP concentration of mice that received adenovirus expressing GFP or PLTP. PLTP protein levels were determined every day throughout 10 days.  $n = 4$  for GFP and  $n = 5$  for PLTP. Average bar graph of 10 days is shown in the right graph.  $***P < 0.001$  by Student's  $t$ -test.
- D Plasma PLTP concentration of rPLTP-treated mice. PLTP protein levels were determined during 24 h following i.v. injection of rPLTP at 360 µg per mouse.  $n = 1$  for both groups.
- E Liver *Pltp* mRNA expression in mice that received AAV GFP or PLTP. *Tbp* was used as an internal control.  $n = 4$  for GFP and  $n = 6$  for PLTP.  $***P < 0.001$  relative to GFP by Student's  $t$ -test.

Data information: All the data were represented as mean  $\pm$  SEM.

Source data are available online for this figure.

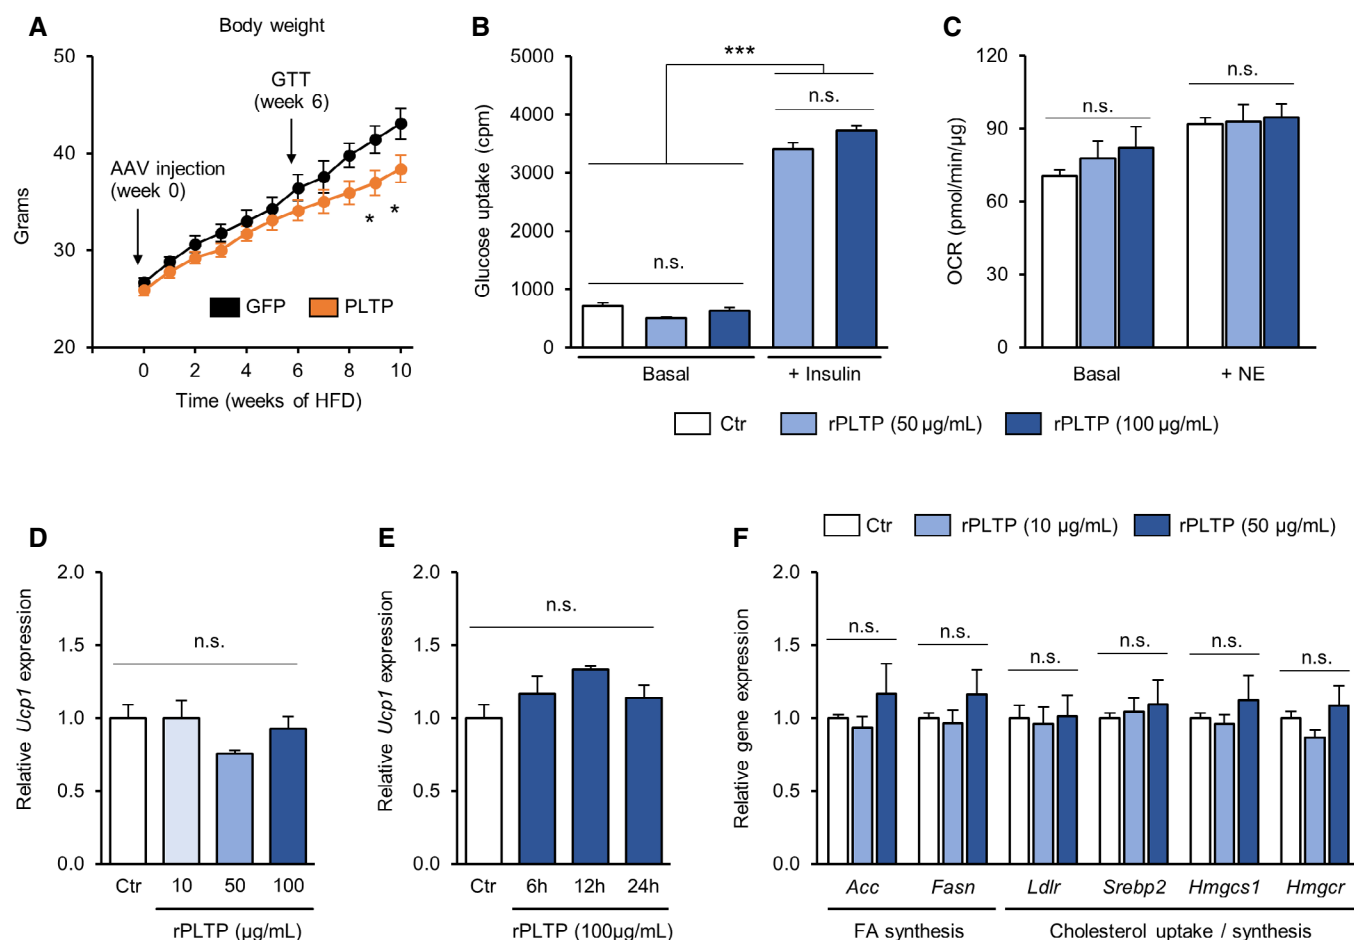

**Figure EV3. The systemic vs cell-autonomous effects of PLTP on energy metabolism.**

- A Bodyweight of mice that received AAV GFP (control) or PLTP on HFD.  $n = 7$  for GFP and  $n = 10$  for PLTP.  $*P < 0.05$  relative to GFP by two-way repeated-measures ANOVA followed by Bonferroni's test. Glucose tolerance test was performed at 6 weeks of HFD, and the result is shown in Fig. 3D.
- B Glucose uptake in differentiated brown adipocytes treated with rPLTP. 0.1% BSA was used as a control (Ctr). A subset of cells was treated with insulin to measure insulin-dependent glucose uptake.  $n = 3$  for all groups.  $***P < 0.001$  by one-way ANOVA followed by Tukey's test. N.S., not significant.
- C OCR in differentiated brown adipocytes treated with rPLTP. OCR was performed at a basal state (without NE stimulation) and NE-stimulated state.  $n = 10$  for Ctr,  $n = 5$  both for rPLTP 50 and 100  $\mu\text{g/ml}$ . One-way ANOVA followed by Tukey's test. N.S., not significant.
- D *Ucp1* mRNA levels in differentiated brown adipocytes treated with rPLTP at indicated doses for 24 h. *Tbp* was used as an internal control.  $n = 3$  for all the groups. One-way ANOVA followed by Tukey's test. N.S., not significant.
- E *Ucp1* mRNA levels in differentiated adipocytes treated with rPLTP for indicated time points. *Tbp* was used as an internal control.  $n = 3$  for all the groups. One-way ANOVA followed by Tukey's test. N.S., not significant.
- F Cultured hepatocytes were treated with recombinant PLTP protein (10 or 50  $\mu\text{g/ml}$ ) or vehicle (DMSO) for 24 h. The effect of PLTP on indicated genes was assessed by qRT-PCR. *Tbp* was used as an internal control.  $n = 3$  for all groups. One-way ANOVA followed by Tukey's test. N.S., not significant.

Data information: All the data were represented as mean  $\pm$  SEM.

Source data are available online for this figure.

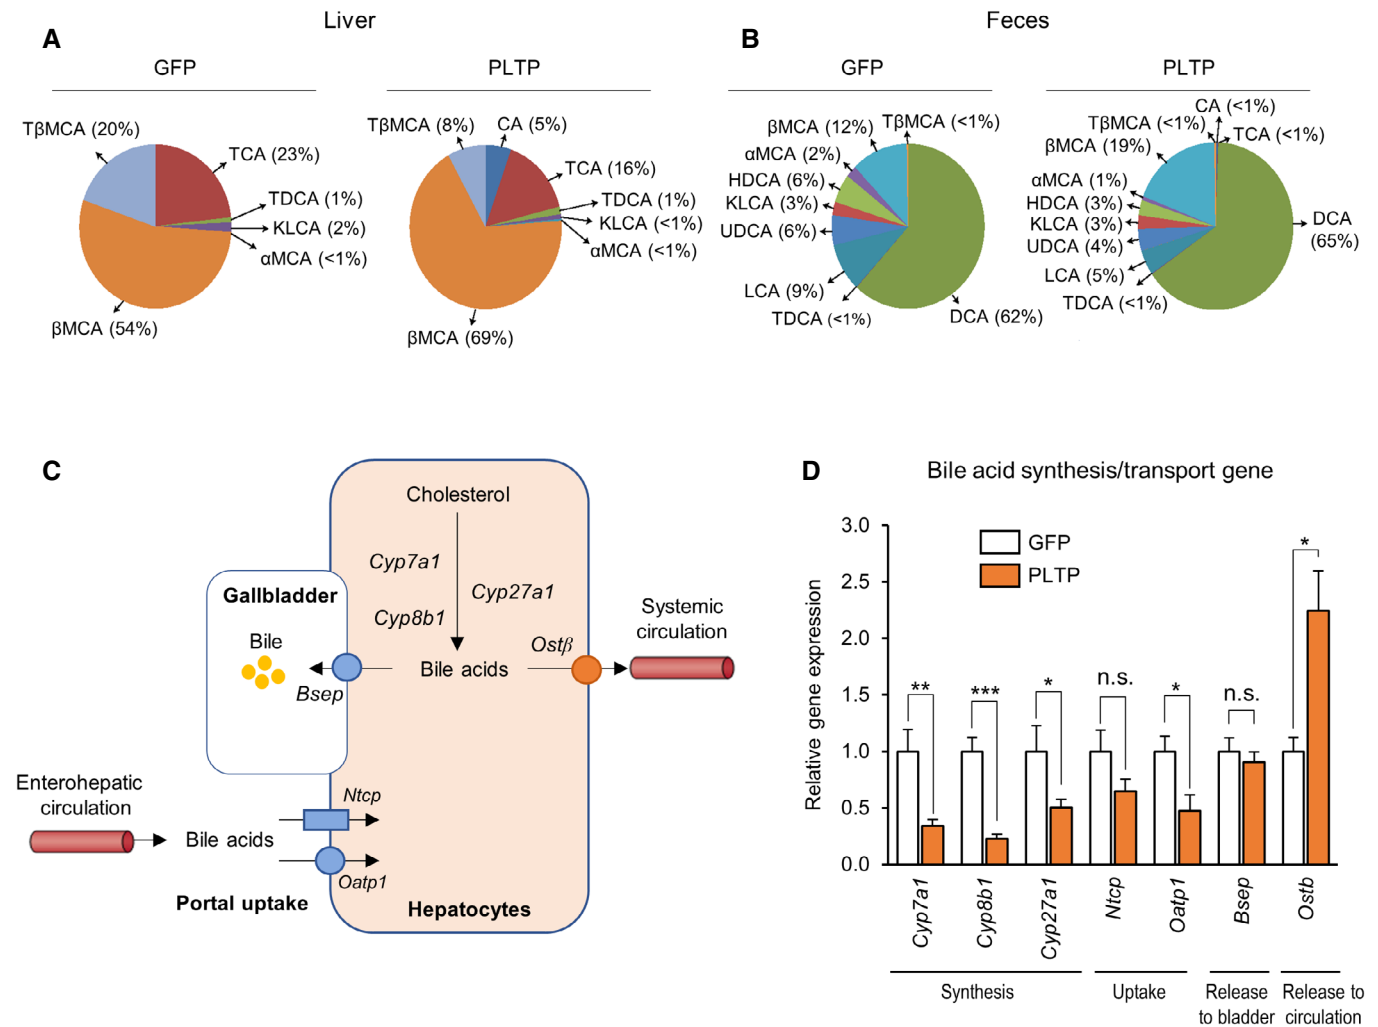

**Figure EV4. The effect of PLTP on plasma bile acid composition and liver expression of bile acids synthesis genes.**

A Bile acid composition in the liver of mice that received adenovirus expressing GFP (control) or PLTP on HFD. Pooled samples of  $n = 5$  for both groups.

B Bile acid composition in the feces of mice in (A). Pooled samples of  $n = 5$  for both groups.

C Schematic illustration of the hepatic bile acid synthesis, uptake, and secretion pathway.

D Relative expression of indicated genes involving in the bile acid synthesis, uptake, and secretion in the liver of mice that received GFP control and PLTP on HFD.

*Tbp* was used as an internal control.  $n = 4$  for GFP,  $n = 6$  for PLTP except *Ostb*  $n = 5$ . \* $P < 0.05$ , \*\* $P < 0.01$ , \*\*\* $P < 0.001$  relative to GFP by Student's *t*-test. N.S., not significant.

Data information: All the data were represented as mean  $\pm$  SEM.

Source data are available online for this figure.

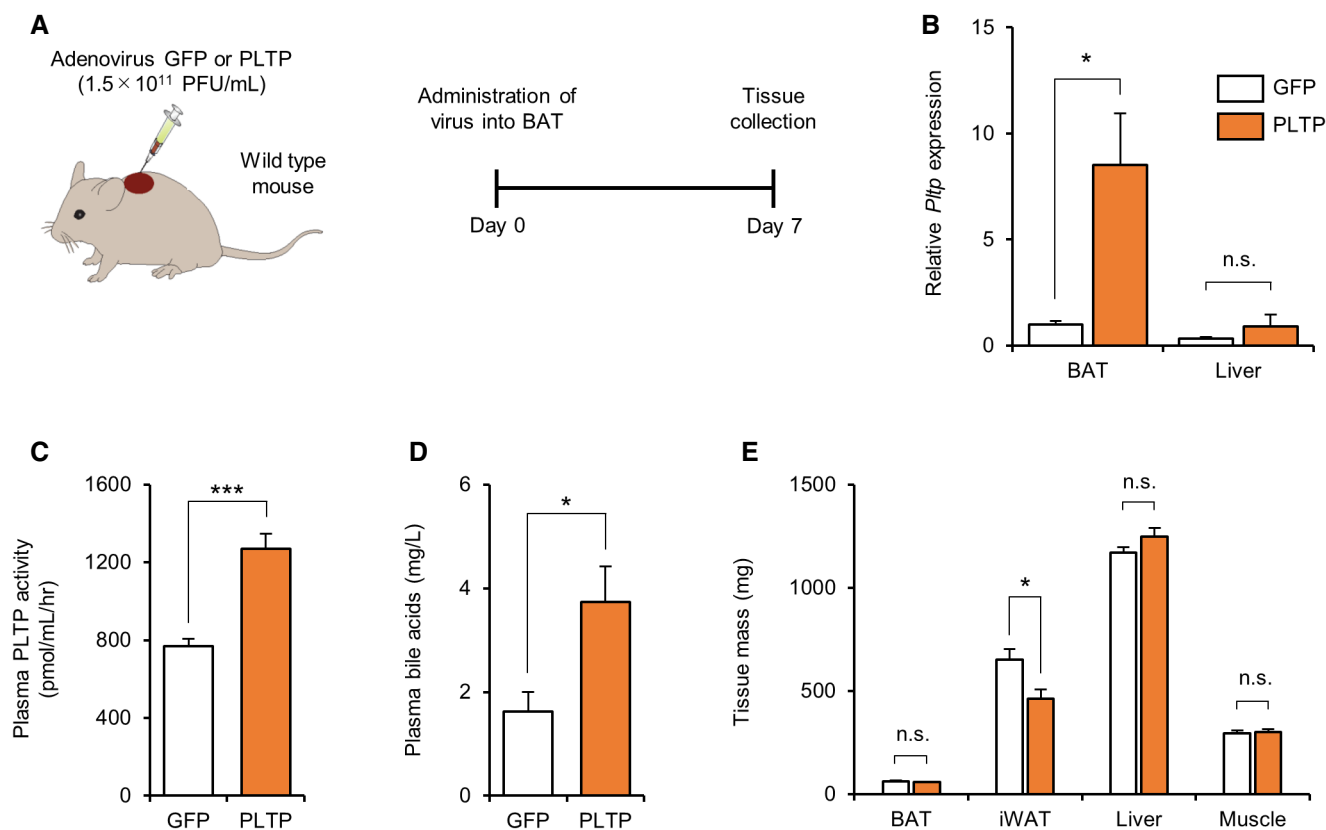

**Figure EV5. The effect of BAT-derived PLTP on plasma bile acids and adiposity.**

A Schematic illustration of the experiment. Tissues were harvested from mice that received adenovirus expressing GFP (control) or PLTP in the BAT.  
 B The expression of *Pltp* in the BAT and liver of mice in (A). *Tbp* was used as an internal control.  $n = 6$  for GFP and  $n = 7$  for PLTP. \* $P < 0.05$  relative to GFP by Student's *t*-test. N.S., not significant.  
 C Plasma PLTP activity in (A).  $n = 6$  for GFP and  $n = 8$  PLTP. \*\*\* $P < 0.001$  relative to GFP by Student's *t*-test.  
 D Plasma bile acid levels in (A).  $n = 5$  for GFP and  $n = 7$  PLTP. \* $P < 0.05$  relative to GFP by Student's *t*-test.  
 E Quantification of indicated tissue mass in (A).  $n = 6$  for GFP and  $n = 8$  PLTP. \* $P < 0.05$  relative to GFP by Student's *t*-test. N.S., not significant.

Data information: All the data were represented as mean  $\pm$  SEM.  
 Source data are available online for this figure.
